# Supplementary material for: Polygenic Risk Score Is Associated With Intraocular Pressure and Improves Glaucoma Prediction in the UK Biobank Cohort
Source: PubMed Central journal article supplement — Transl Vis Sci Technol. 2019 Apr 4;8(2):10. doi: 10.1167/tvst.8.2.10 (PMC6450641; doi:10.1167/tvst.8.2.10), 2019-04-04
Supplement: tvst-08-02-10_s02.pdf [file tvst-08-02-10_s02.pdf]

**Supplementary Table 2. Association between unweighted polygenic risk scores and intraocular pressure across five cross-validation runs**

| Model       | Number of SNPs selected | $\beta$ | SE     | $P$                    |
|-------------|-------------------------|---------|--------|------------------------|
| Iteration 1 | 1,253                   | 0.0238  | 0.0008 | $2.9 \times 10^{-194}$ |
| Iteration 2 | 1,262                   | 0.0232  | 0.0008 | $2.6 \times 10^{-189}$ |
| Iteration 3 | 1,242                   | 0.0236  | 0.0008 | $1.2 \times 10^{-194}$ |
| Iteration 4 | 1,274                   | 0.0249  | 0.0008 | $3.0 \times 10^{-208}$ |
| Iteration 5 | 1,250                   | 0.0244  | 0.0008 | $1.5 \times 10^{-206}$ |

SNP = single nucleotide polymorphisms; SE = standard error.
