# Supplementary material for: Polygenic Risk Score Is Associated With Intraocular Pressure and Improves Glaucoma Prediction in the UK Biobank Cohort
Source: PubMed Central journal article supplement — Transl Vis Sci Technol. 2019 Apr 4;8(2):10. doi: 10.1167/tvst.8.2.10 (PMC6450641; doi:10.1167/tvst.8.2.10), 2019-04-04
Supplement: tvst-08-02-10_s03.pdf [file tvst-08-02-10_s03.pdf]

**Supplementary Table 3. Associations between polygenic risk scores and intraocular pressure across five cross-validation runs**

(A)

| Weighted PRS Model | PRS built using SNPs with $P < 5 \times 10^{-5}$ |                        | PRS built using SNPs with $P < 5 \times 10^{-8}$ |                        |
|--------------------|--------------------------------------------------|------------------------|--------------------------------------------------|------------------------|
|                    | Number of SNPs selected                          | $P$                    | Number of SNPs selected                          | $P$                    |
| Iteration 1        | 1,253                                            | $1.0 \times 10^{-190}$ | 220                                              | $8.4 \times 10^{-121}$ |
| Iteration 2        | 1,262                                            | $5.2 \times 10^{-201}$ | 228                                              | $4.9 \times 10^{-138}$ |
| Iteration 3        | 1,242                                            | $3.2 \times 10^{-202}$ | 223                                              | $3.6 \times 10^{-144}$ |
| Iteration 4        | 1,274                                            | $5.1 \times 10^{-205}$ | 234                                              | $4.7 \times 10^{-141}$ |
| Iteration 5        | 1,250                                            | $3.5 \times 10^{-209}$ | 219                                              | $2.1 \times 10^{-150}$ |

(B)

| Unweighted PRS Model | PRS built using SNPs with $P < 5 \times 10^{-5}$ |                        | PRS built using SNPs with $P < 5 \times 10^{-8}$ |                        |
|----------------------|--------------------------------------------------|------------------------|--------------------------------------------------|------------------------|
|                      | Number of SNPs selected                          | $P$                    | Number of SNPs selected                          | $P$                    |
| Iteration 1          | 1,253                                            | $2.9 \times 10^{-194}$ | 220                                              | $3.7 \times 10^{-117}$ |
| Iteration 2          | 1,262                                            | $2.6 \times 10^{-189}$ | 228                                              | $5.2 \times 10^{-129}$ |
| Iteration 3          | 1,242                                            | $1.2 \times 10^{-194}$ | 223                                              | $1.4 \times 10^{-142}$ |
| Iteration 4          | 1,274                                            | $3.0 \times 10^{-208}$ | 234                                              | $2.5 \times 10^{-136}$ |
| Iteration 5          | 1,250                                            | $1.5 \times 10^{-206}$ | 219                                              | $8.1 \times 10^{-143}$ |

(A) The association results between IOP and weighted PRSs using SNPs with  $P < 5 \times 10^{-5}$  and  $5 \times 10^{-8}$ ; (B) The association results between IOP and unweighted PRSs. The association results of all runs in the  $5 \times 10^{-5}$  threshold category are more significant than those in the  $5 \times 10^{-8}$  category.

Abbreviations: SNP = single nucleotide polymorphism; IOP = intraocular pressure; PRS = polygenic risk score.
