# Supplementary material for: Polygenic Risk Score Is Associated With Intraocular Pressure and Improves Glaucoma Prediction in the UK Biobank Cohort
Source: PubMed Central journal article supplement — Transl Vis Sci Technol. 2019 Apr 4;8(2):10. doi: 10.1167/tvst.8.2.10 (PMC6450641; doi:10.1167/tvst.8.2.10), 2019-04-04
Supplement: tvst-08-02-10_s04.pdf [file tvst-08-02-10_s04.pdf]

**Supplementary Table 4. Area under the curve of different prediction models for primary open-angle glaucoma using weighted and unweighted polygenic risk scores**

|                | PRS built using SNPs<br>with $P < 5 \times 10^{-5}$ |       | PRS built using SNPs<br>with $P < 5 \times 10^{-8}$ |       |
|----------------|-----------------------------------------------------|-------|-----------------------------------------------------|-------|
|                | Number of SNPs<br>selected                          | AUC   | Number of SNPs<br>selected                          | AUC   |
| Weighted PRS   | 1,691                                               | 0.766 | 332                                                 | 0.750 |
| Unweighted PRS | 1,691                                               | 0.764 | 332                                                 | 0.749 |

PRS built using SNPs with  $P < 5 \times 10^{-5}$  gives better prediction performance, i.e. higher area under the curve, on primary open-angle glaucoma than PRS built using SNPs with  $P < 5 \times 10^{-8}$ . AUCs are derived from logistic regression models adjusting for age and sex.

Abbreviations: SNP = single nucleotide polymorphism; IOP = intraocular pressure; PRS = polygenic risk score; AUC = area under the curve.
