# Supplementary material for: Polygenic Risk Score Is Associated With Intraocular Pressure and Improves Glaucoma Prediction in the UK Biobank Cohort
Source: PubMed Central journal article supplement — Transl Vis Sci Technol. 2019 Apr 4;8(2):10. doi: 10.1167/tvst.8.2.10 (PMC6450641; doi:10.1167/tvst.8.2.10), 2019-04-04
Supplement: tvst-08-02-10_s05.pdf [file tvst-08-02-10_s05.pdf]

**Supplementary Figure 1. Distribution of the unweighted intraocular pressure polygenic risk score and association with primary open-angle glaucoma**

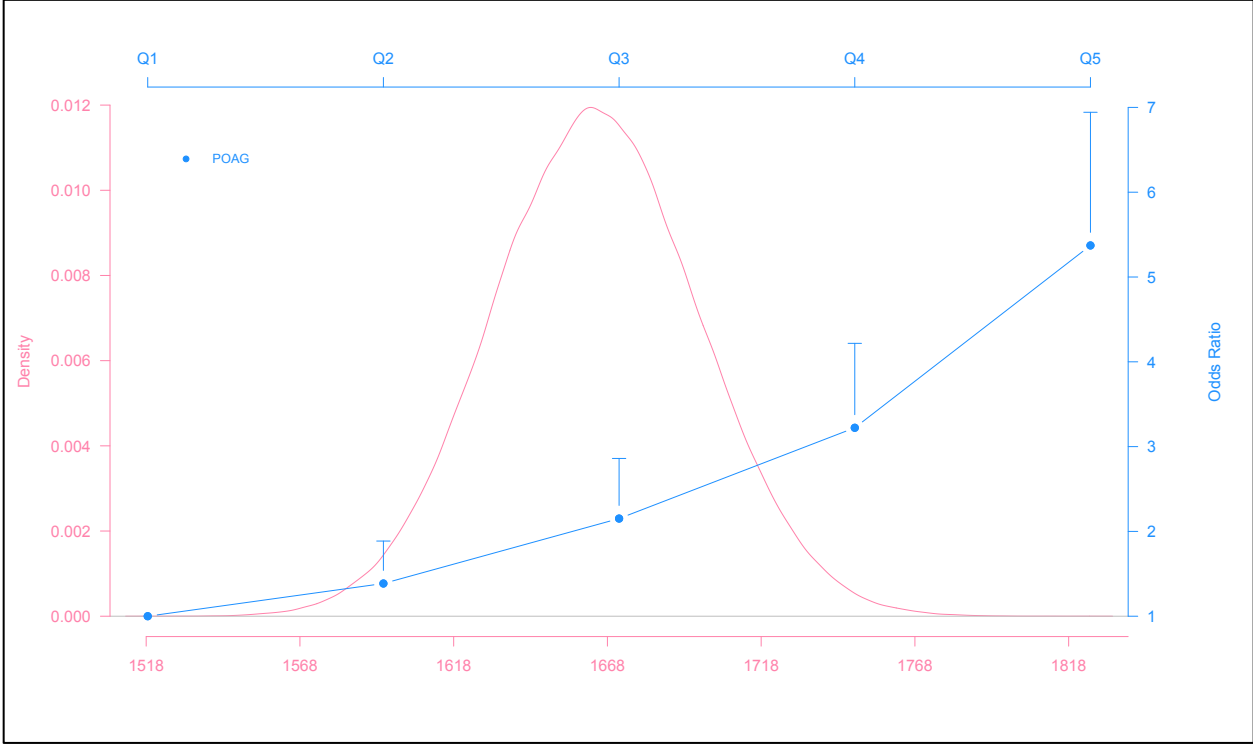

|             | Q1        | Q2         | Q3          | Q4          | Q5          |
|-------------|-----------|------------|-------------|-------------|-------------|
| POAG, n (%) | 70 (7.81) | 96 (10.71) | 148 (16.52) | 221 (24.67) | 361 (40.29) |
