# Supplementary material for: Polygenic Risk Score Is Associated With Intraocular Pressure and Improves Glaucoma Prediction in the UK Biobank Cohort
Source: PubMed Central journal article supplement — Transl Vis Sci Technol. 2019 Apr 4;8(2):10. doi: 10.1167/tvst.8.2.10 (PMC6450641; doi:10.1167/tvst.8.2.10), 2019-04-04

**Supplementary Figure 3. Principal component analysis plot for white participants in the UK Biobank cohort**

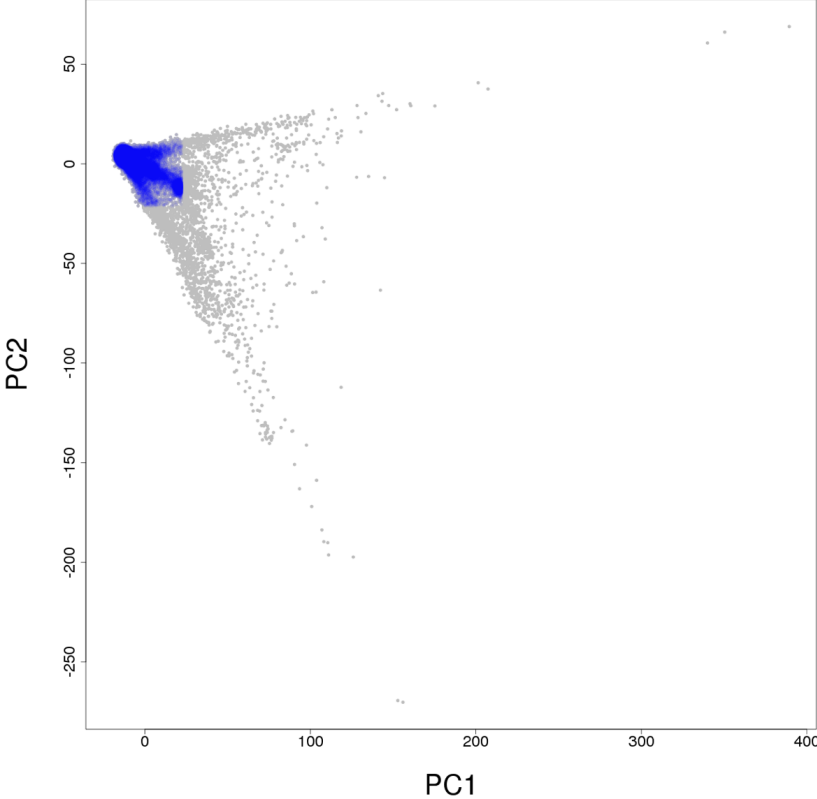

Supplement: tvst-08-02-10_s07.pdf [file tvst-08-02-10_s07.pdf]
